# Supplementary material for: Antibacterial and Osteogenic Properties of Ag Nanoparticles and Ag/TiO2 Nanostructures Prepared by Atomic Layer Deposition
Source: MDPI journal article supplement (doi:10.3390/jfb13020062), 2022-05-18
Supplement: s1 [file s1]

## Supplementary Information

# Antibacterial and Osteogenic Properties of Ag Nanoparticles and Ag/TiO<sub>2</sub> Nanostructures Prepared by Atomic Layer Deposition

Denis Nazarov <sup>1,2,\*</sup>, Ilya Ezhov <sup>2</sup>, Natalia Yudintceva <sup>3</sup>, Maxim Shevtsov <sup>3,4</sup>, Aida Rudakova <sup>1</sup>, Vladimir Kalganov <sup>1</sup>, Vladimir Tolmachev <sup>5</sup>, Yuliya Zharova <sup>5</sup>, Oleksiy Lutakov <sup>6</sup>, Ludmila Kraeva <sup>7</sup>, Elizaveta Rogacheva <sup>7</sup> and Maxim Maximov <sup>2</sup>

<sup>1</sup> Saint Petersburg State University, Universitetskaya nab, 7/9, 199034 Saint Petersburg, Russia; aida.rudakova@spbu.ru (A.R.); vdkalganov@yandex.ru (V.K.)

<sup>2</sup> Peter the Great Saint Petersburg Polytechnic University, Polytechnicheskaya, 29, 195221 Saint Petersburg, Russia; iezhov1994@gmail.com (I.E.); maximsbstu@mail.ru (M.M.)

<sup>3</sup> Institute of Cytology of the Russian Academy of Sciences (RAS), Tikhoretsky Ave., 4, 194064 Saint Petersburg, Russia; yudintceva@mail.ru (N.Y.); shevtsov-max@mail.ru (M.S.)

<sup>4</sup> Center of Translational Cancer Research (TranslaTUM), Klinikum Rechts der Isar, Technical University Munich, Einstein Str. 25, 81675 Munich, Germany

<sup>5</sup> Ioffe Institute, Polytechnicheskaya, 26, 194021 Saint Petersburg, Russia; tva@mail.ioffe.ru (V.T.); piliouguina@mail.ioffe.ru (Y.Z.)

<sup>6</sup> Department of Solid State Engineering, Institute of Chemical Technology, 16628 Prague, Czech Republic; oleksiy.lyutakov@vscht.cz

<sup>7</sup> Saint-Petersburg Pasteur Institute of Epidemiology and Microbiology, 14 Mira Street, 197101 Saint Petersburg, Russia; lykraeva@yandex.ru (L.K.); elizvla@yandex.ru (E.R.)

\* Correspondence: dennazar1@yandex.ru; Tel.: +7-812-428-4033

**Table S1.** The effect of Ag(fod)(PEt<sub>3</sub>) evaporator temperature on the ALD silver growth.

| Temperature of Ag(fod)(PEt <sub>3</sub> ) Evaporator, °C | Reactor Temperature, °C | Ag(fod)(PEt <sub>3</sub> ) Pulse Time/Purge Time, s | Number of ALD Cycles | Thickness, nm | Growth Per Cycle, nm |
|----------------------------------------------------------|-------------------------|-----------------------------------------------------|----------------------|---------------|----------------------|
| 130                                                      | 147                     | 4/5                                                 | 350                  | <1            | 0.0014 ± 0.0014      |
| 140                                                      | 156                     | 4/5                                                 | 700                  | 1.9-3.9       | 0.0041 ± 0.0014      |
| 150                                                      | 165                     | 4/5                                                 | 400                  | 1.1-2.5       | 0.0045 ± 0.0018      |
| 160                                                      | 173                     | 4/5                                                 | 400                  | 0.3-1.1       | 0.0018 ± 0.001       |
| 170                                                      | 173                     | 4/5                                                 | 400                  | 0             | 0                    |
| 180                                                      | 182                     | 4/5                                                 | 350                  | 0             | 0                    |

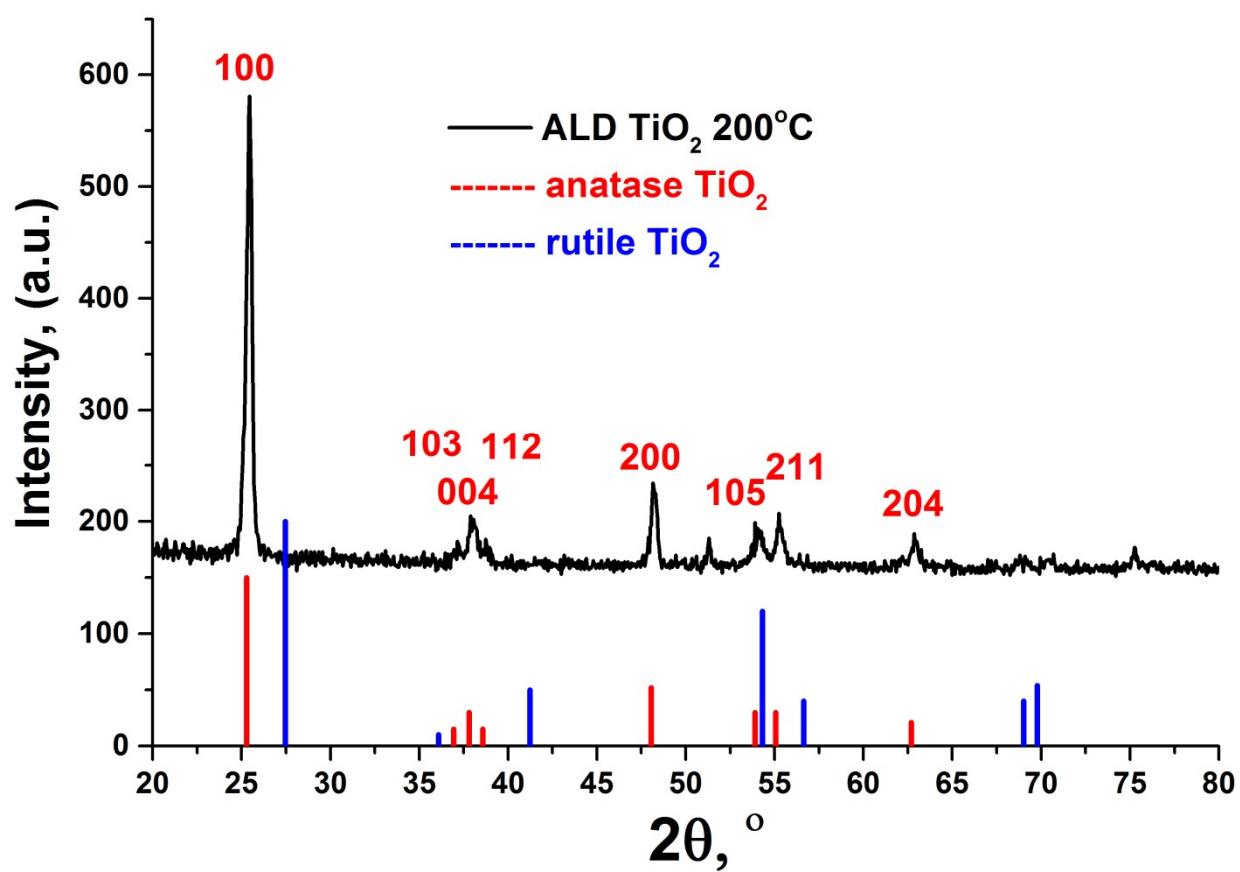

Figure S1. GIXRD pattern of the ALD  $\text{TiO}_2$  nanolayers deposited on the silicon at 200 °C.

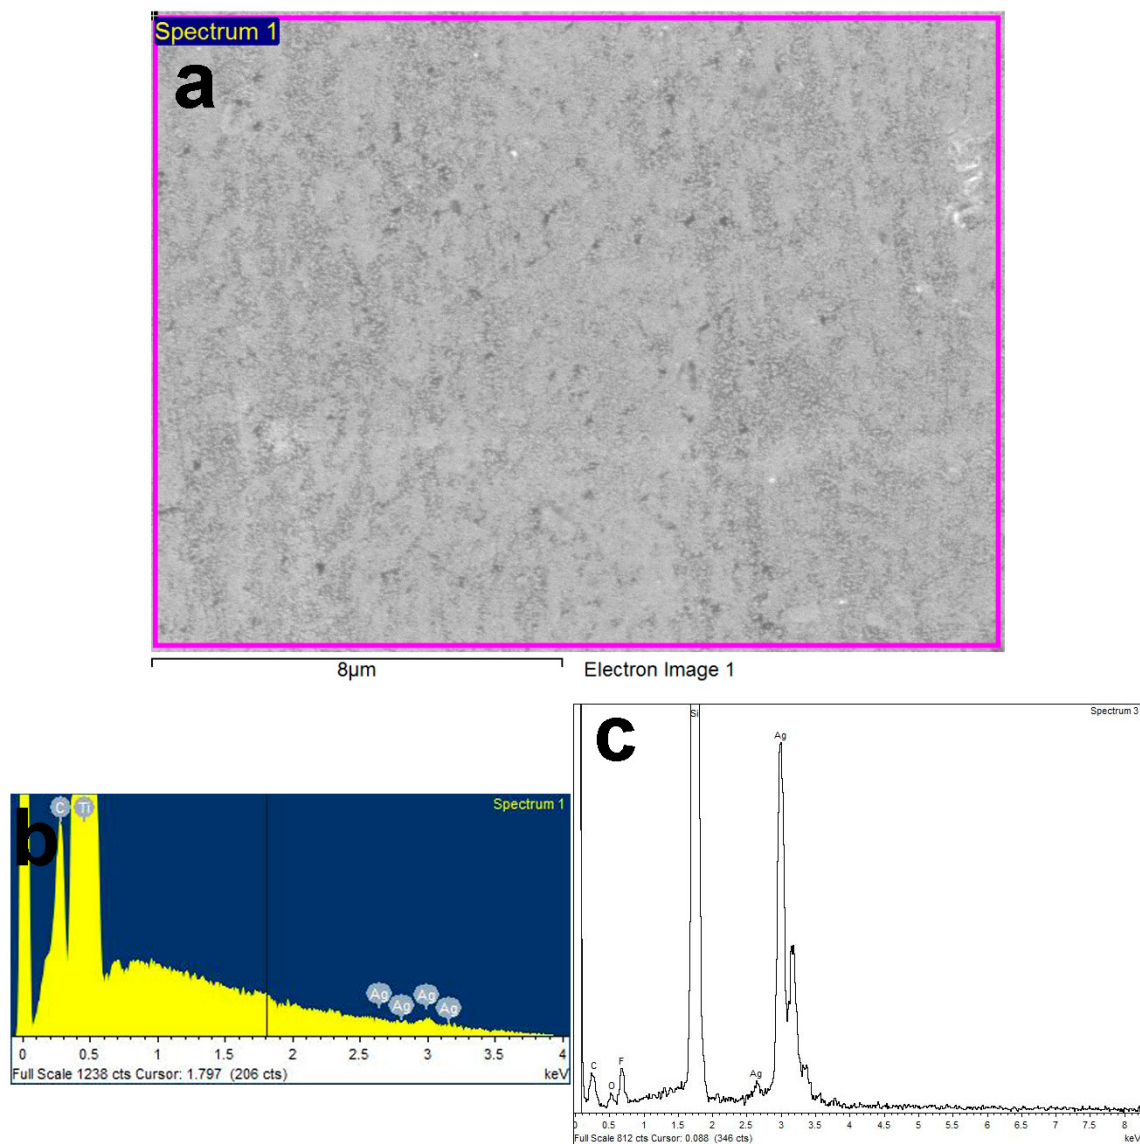

**Figure S2.** SEM-EDS results for Ti-Ag samples. SEM image of scan area for EDS measurements (a), EDS spectrum of full scan area (b), EDS spectrum of random point (c).

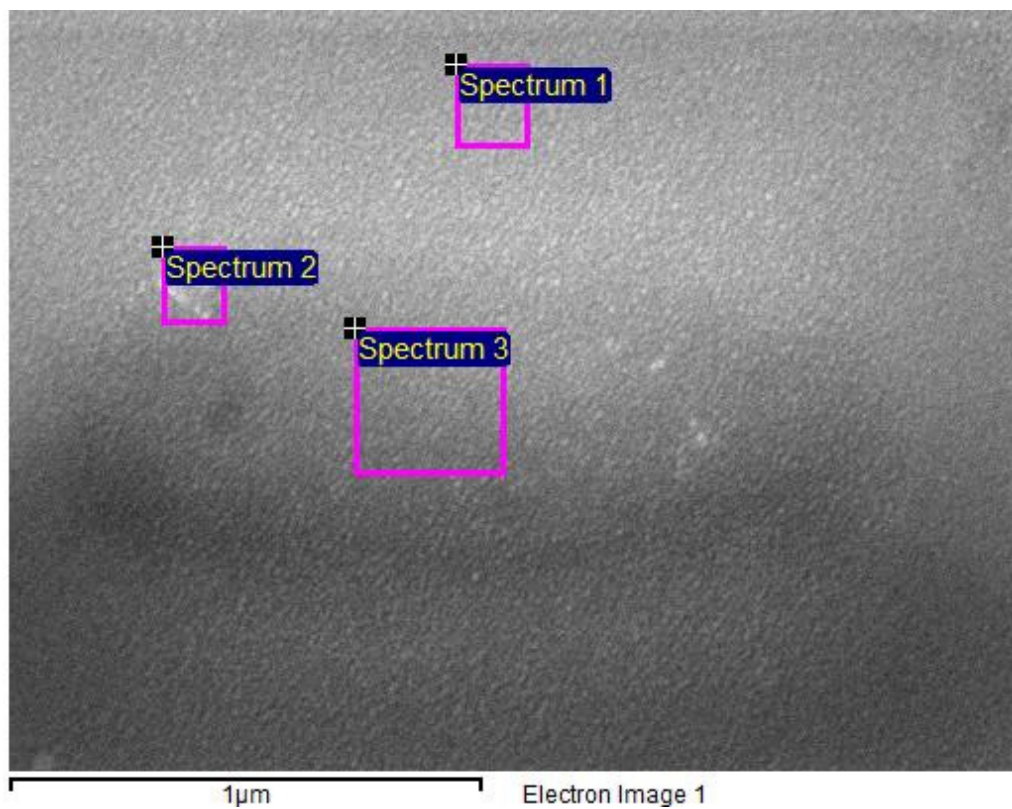

**Figure S3.** SEM image of scan area for EDS measurements of Ti-TiO<sub>2</sub>-Ag sample.

**Table S2.** Results SEM-EDS study of Ti-TiO<sub>2</sub>-Ag sample in different scan areas.

| <b>Spectrum</b> | <b>O, at %</b> | <b>Ti, at %</b> | <b>Ag, at %</b> |
|-----------------|----------------|-----------------|-----------------|
| Spectrum 1      | 7.08           | 92.33           | 0.58            |
| Spectrum 2      | 9.22           | 89.96           | 0.82            |
| Spectrum 3      | 7.77           | 91.68           | 0.55            |
| Mean            | 8.02           | 91.32           | 0.65            |

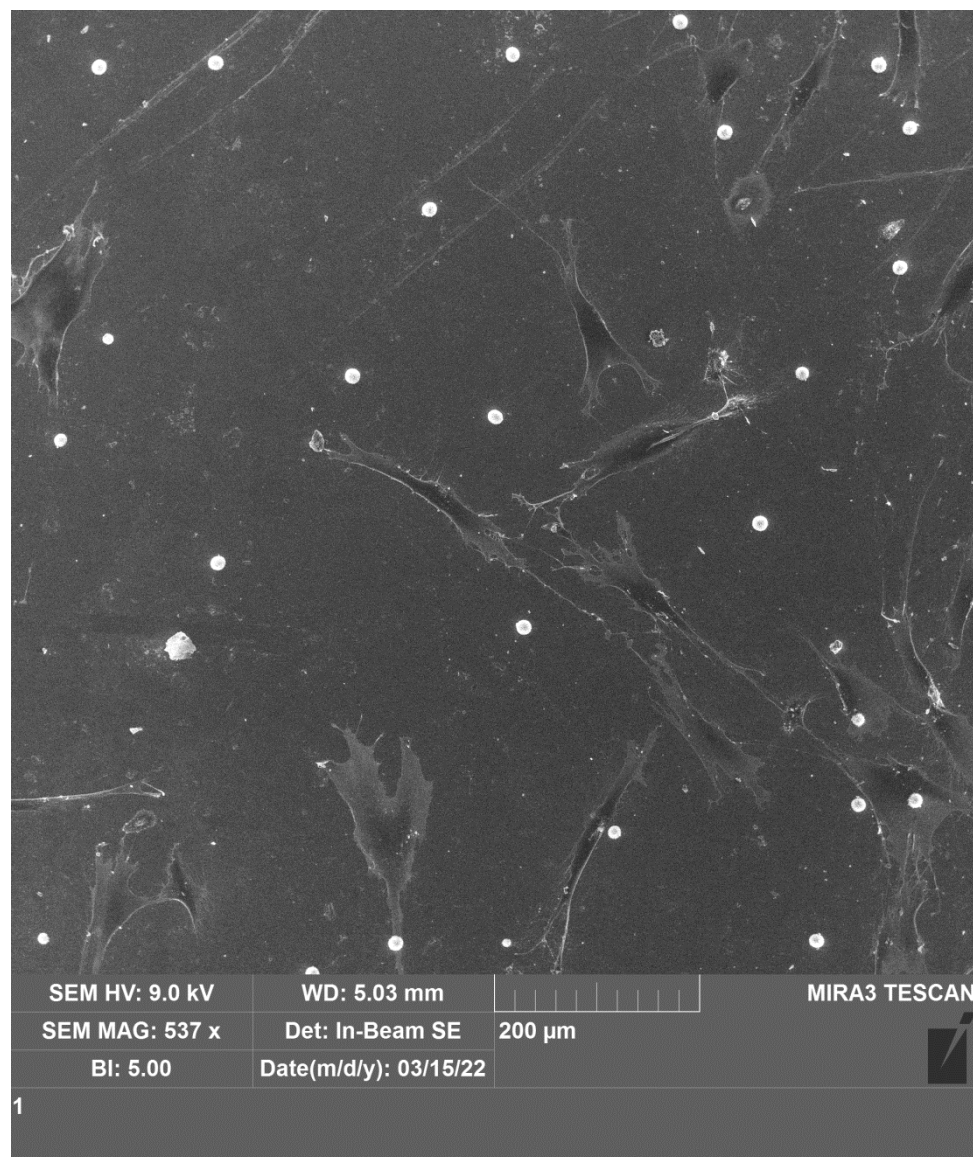

**Figure S4.** SEM image of FetMSCs cultivating during 24 h on the surface Ti-TiO<sub>2</sub> sample.
